# Supplementary material for: Facile preparation of 3D ordered mesoporous CuOx–CeO2 with notably enhanced efficiency for the low temperature oxidation of heteroatom-containing volatile organic compounds
Source: Royal Society of Chemistry journal article supplement (doi:10.1039/c3ra42566e), 2013-01-01
Supplement: c3ra42566e.pdf [file c3ra42566e.pdf]

## Supplementary Information

### **Facile preparation of 3D ordered mesoporous CuO<sub>x</sub>-CeO<sub>2</sub> with notable enhanced efficiency for heteroatom-contained volatile organic compounds low-temperature oxidation**

Chi He<sup>1,2</sup>, Yanke Yu<sup>1</sup>, Changwei Chen<sup>1</sup>, Lin Yue<sup>3</sup>, Nanli Qiao<sup>3</sup>, Qun Shen<sup>4</sup>,  
Jinsheng Chen<sup>1,\*</sup>, Zhengping Hao<sup>3,†</sup>

<sup>1</sup>*Key Lab of Urban Environment and Health, Institute of Urban Environment, Chinese Academy of Sciences, Xiamen 361021, P.R. China*

<sup>2</sup>*Department of Environmental Science and Engineering, School of Energy and Power Engineering, Xi'an Jiaotong University, Xi'an 710049, P.R. China*

<sup>3</sup>*Department of Environmental Nano-materials, Research Center for Eco-Environmental Sciences, Chinese Academy of Sciences, Beijing 100085, P.R. China*

<sup>4</sup>*Research Center for Greenhouse Gases and Environmental Engineering, Shanghai Advanced Research Institute, Chinese Academy of Sciences, Shanghai 201210, P.R. China*

\*Corresponding author. Tel./Fax: +86 592 6190765

†Corresponding author. Tel./Fax: +86 10 62923564

E-mail address: [jschen@iue.ac.cn](mailto:jschen@iue.ac.cn) (J.S. Chen), [zpinghao@rcees.ac.cn](mailto:zpinghao@rcees.ac.cn) (Z. P. Hao)

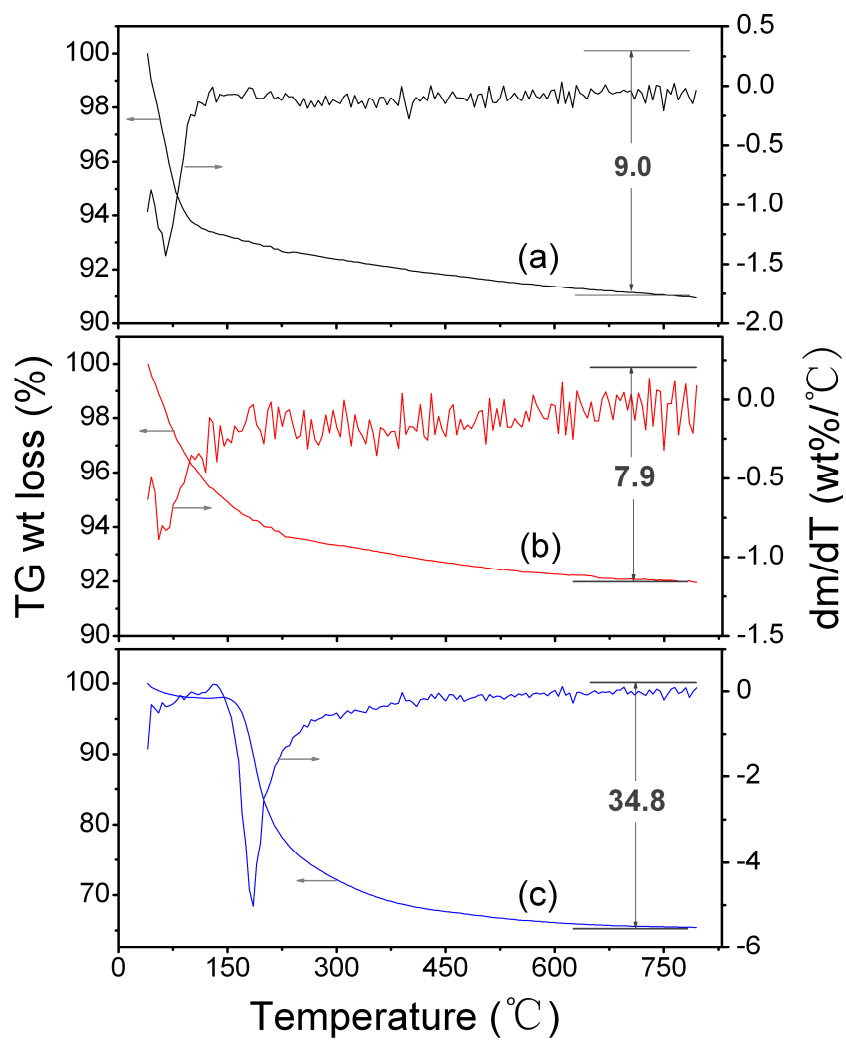

19

20 **Fig. S1** TG-DTG profiles of (a) FMA-SBA-16, (b) calcined SBA-16, and (c) as-SBA-16.

21

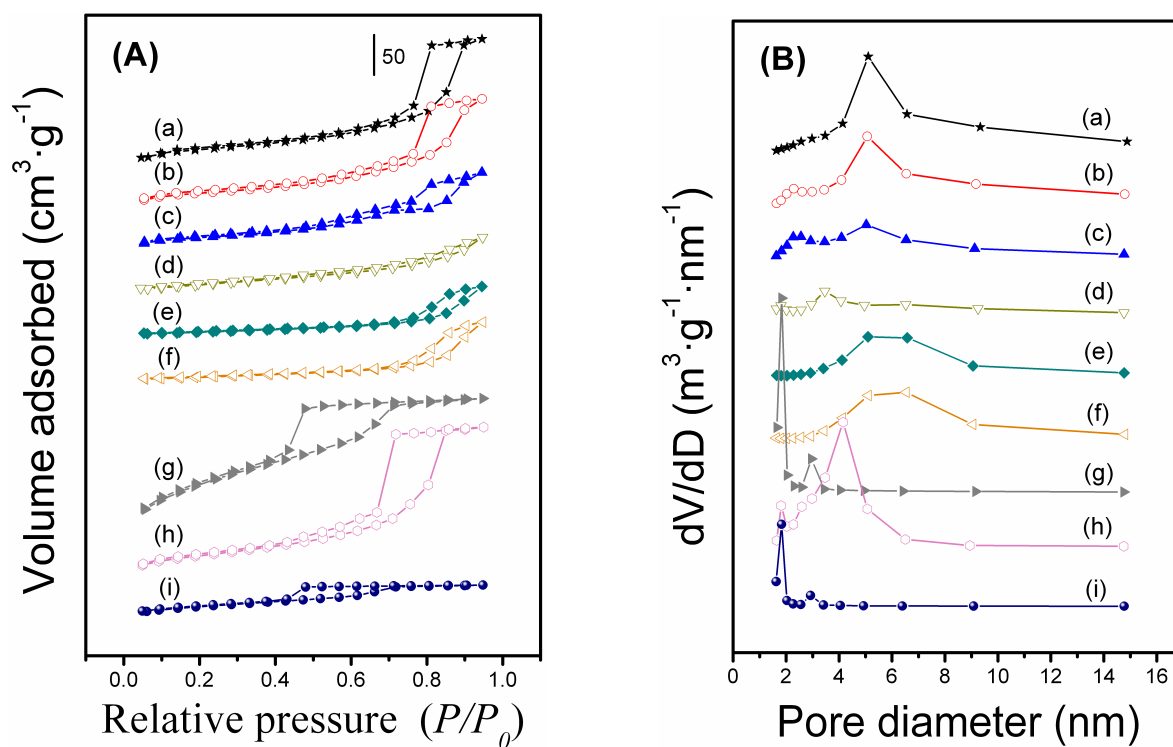

22 **Fig. S2**  $\text{N}_2$  adsorption/desorption isotherms (A) and pore size distribution (B) of (a) htpCC10,  
23 (b) htpCC20, (c) htpCC30, (d) copCC, (e) impCC, (f)  $\text{CeO}_2$ , (g) calcined SBA-16, (h)  
24 FMA-SBA-16, and (i) as-SBA-16.

25

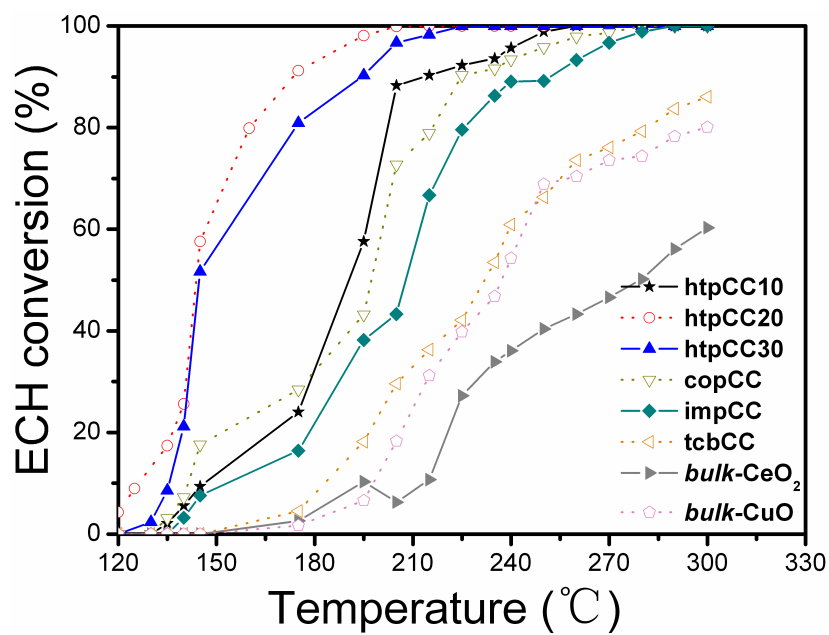

26

27 **Fig. S3** Light-off curves of ECH oxidation over synthesized catalysts (300 mg catalyst, 300 ppm

28 ECH, 21% O<sub>2</sub>, N<sub>2</sub> balance; GHSV = 18,400 h<sup>-1</sup>)

29

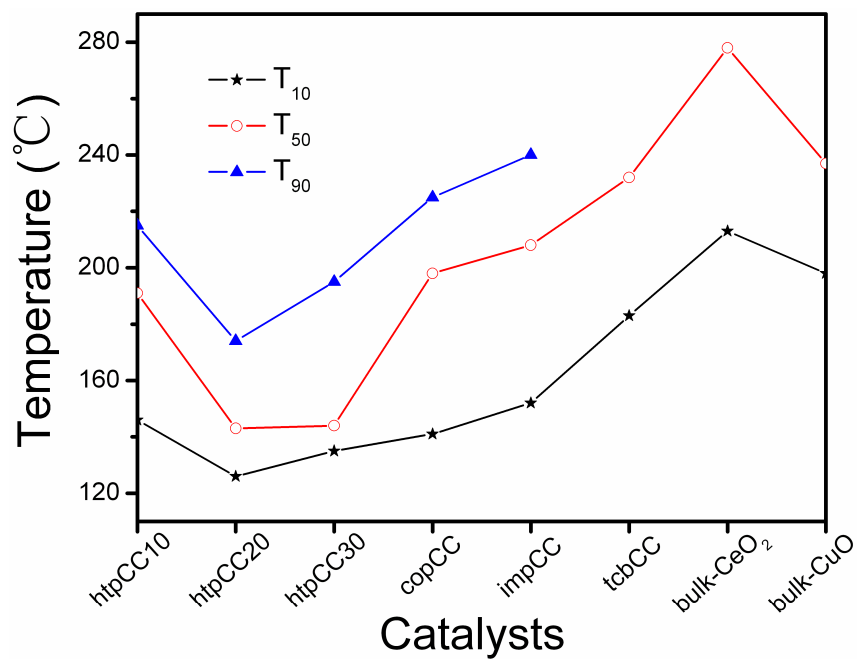

30

31 **Fig. S4** T<sub>10</sub>, T<sub>50</sub>, and T<sub>90</sub> for ECH oxidation over synthesized catalysts (300 mg catalyst, 300 ppm

32 ECH, 21% O<sub>2</sub>, N<sub>2</sub> balance; GHSV = 18,400 h<sup>-1</sup>)

33

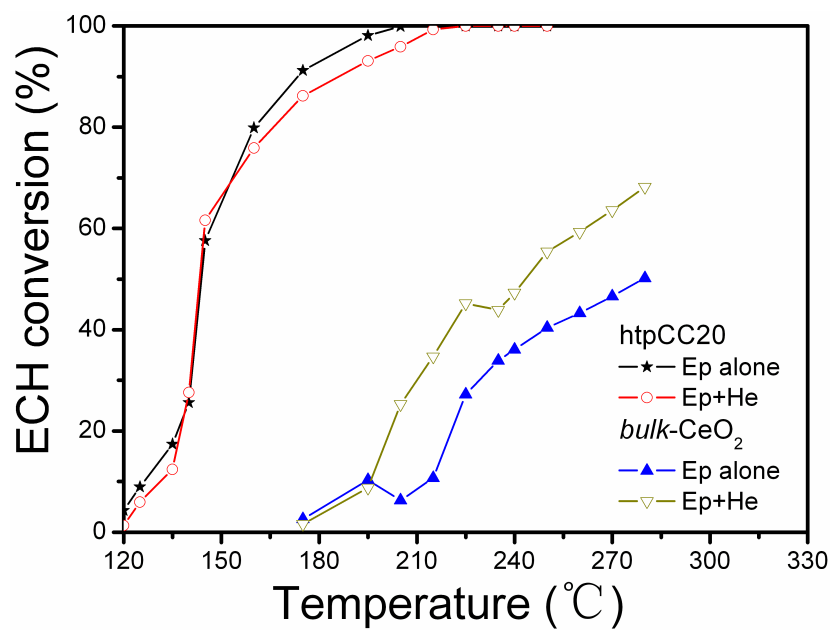

34

35 **Fig. S5** Light-off curves of ECH oxidation over Pd-loaded catalysts (300 mg catalyst, 300 ppm

36 ECH, 1000 ppm n-hexane, 21% O<sub>2</sub>, N<sub>2</sub> balance; GHSV = 18,400 h<sup>-1</sup>)
